# Supplementary material for: Differences in Prevalence of Colorectal Carcinoma by Gender and Marital Status and Expression of DNA Mismatch Repair Proteins
Source: Preprints.org preprint supplement (doi:10.20944/preprints202407.1460.v1), 2024-07-18
Supplement: Supplementary file 1 [file supplementary]

## Sheet: Sheet 1 - Race and CRC
Supplementary Table 1: Race/ethnicity and Colorectal Carcinoma
Race/ethnicity	Asian	Black	Hispanic	Other	White	Total	p
	(N=121)	(N=40)	(N=179)	(N=133)	(N=545)	(N=1018)
Married							<0.01
- Divorced	7 ( 5.8%)	7 (17.5%)	13 ( 7.3%)	15 (11.3%)	79 (14.5%)	121 (11.9%)
- Married	73 (60.3%)	17 (42.5%)	96 (53.6%)	77 (57.9%)	261 (47.9%)	524 (51.5%)
- Other	0 ( 0.0%)	0 ( 0.0%)	1 ( 0.6%)	5 ( 3.8%)	3 ( 0.6%)	9 ( 0.9%)
- Single	33 (27.3%)	13 (32.5%)	41 (22.9%)	28 (21.1%)	121 (22.2%)	236 (23.2%)
- Widowed	8 ( 6.6%)	3 ( 7.5%)	28 (15.6%)	8 ( 6.0%)	81 (14.9%)	128 (12.6%)
BMI	24.0 [21.0;27.0]	27.0 [23.5;32.5]	27.0 [23.0;31.0]	26.0 [22.0;30.0]	25.0 [22.0;30.0]	26.0 [22.0;30.0]	<0.01
MMRP							0.124
- Proficient	91 (90.1%)	25 (80.6%)	121 (84.6%)	90 (81.8%)	309 (79.2%)	636 (82.1%)
- Deficient	10 ( 9.9%)	6 (19.4%)	22 (15.4%)	20 (18.2%)	81 (20.8%)	139 (17.9%)
Faith (religious belief)	87 (73.1%)	27 (69.2%)	129 (75.4%)	62 (48.4%)	333 (62.5%)	638 (64.4%)	<0.01
Sex (gender)							0.994
- Female	65 (53.7%)	21 (52.5%)	93 (52.0%)	72 (54.1%)	285 (52.3%)	536 (52.7%)
- Male	56 (46.3%)	19 (47.5%)	86 (48.0%)	61 (45.9%)	260 (47.7%)	482 (47.3%)
Patient's age (year)	67.0 [55.0;77.0]	64.0 [54.5;75.5]	64.0 [54.5;74.0]	65.0 [55.0;76.0]	70.0 [60.0;81.0]	68.0 [58.0;78.0]	<0.01
Tumor size (cm)	4.0 [ 2.7; 5.1]	3.9 [ 2.4; 6.8]	4.1 [ 2.3; 6.0]	3.8 [ 2.2; 5.5]	4.1 [ 2.3; 5.6]	4.0 [ 2.3; 5.6]	0.776
Histologic grade							0.34
- Grade 1	42 (34.7%)	15 (37.5%)	42 (23.5%)	38 (28.6%)	150 (27.5%)	287 (28.2%)
- Grade 2	72 (59.5%)	21 (52.5%)	120 (67.0%)	79 (59.4%)	338 (62.0%)	630 (61.9%)
- Grade 3	7 ( 5.8%)	4 (10.0%)	17 ( 9.5%)	16 (12.0%)	57 (10.5%)	101 ( 9.9%)
T stage (TNM-T)							0.516
- 1	18 (14.9%)	6 (15.0%)	28 (15.6%)	20 (15.0%)	84 (15.4%)	156 (15.3%)
- 2	13 (10.7%)	10 (25.0%)	20 (11.2%)	25 (18.8%)	75 (13.8%)	143 (14.0%)
- 3	67 (55.4%)	16 (40.0%)	86 (48.0%)	60 (45.1%)	267 (49.0%)	496 (48.7%)
- 4	23 (19.0%)	8 (20.0%)	45 (25.1%)	28 (21.1%)	119 (21.8%)	223 (21.9%)
Lymph node number	20.0 [16.0;25.0]	17.0 [12.5;24.0]	19.0 [15.0;25.0]	19.0 [14.0;25.0]	18.0 [13.0;24.0]	18.0 [14.0;25.0]	0.157
N stage (TNM-N)							0.736
No data	4 ( 3.3%)	1 ( 2.5%)	5 ( 2.8%)	4 ( 3.0%)	12 ( 2.2%)	26 ( 2.6%)
No nodal metastasis	61 (50.4%)	24 (60.0%)	95 (53.1%)	73 (54.9%)	290 (53.2%)	543 (53.3%)
- 1a	16 (13.2%)	8 (20.0%)	24 (13.4%)	17 (12.8%)	71 (13.0%)	136 (13.4%)
- 1b	16 (13.2%)	3 ( 7.5%)	24 (13.4%)	13 ( 9.8%)	67 (12.3%)	123 (12.1%)
- 1c	5 ( 4.1%)	1 ( 2.5%)	2 ( 1.1%)	1 ( 0.8%)	13 ( 2.4%)	22 ( 2.2%)
- 2a	10 ( 8.3%)	2 ( 5.0%)	9 ( 5.0%)	17 (12.8%)	47 ( 8.6%)	85 ( 8.3%)
- 2b	9 ( 7.4%)	1 ( 2.5%)	20 (11.2%)	8 ( 6.0%)	45 ( 8.3%)	83 ( 8.2%)
BRAF mutation	0 ( 0.0%)	1 (100.0%)	5 (25.0%)	10 (62.5%)	23 (44.2%)	39 (39.8%)
MLH methylation	2 (40.0%)	2 (100.0%)	4 (100.0%)	8 (80.0%)	32 (97.0%)	48 (88.9%)
Lynch syndrome	4 (40.0%)	3 (50.0%)	5 (22.7%)	4 (20.0%)	12 (14.8%)	28 (20.1%)	0.121
Supple- Table 2: Faith (religious belief) and Colorectal Carcinoma
Faith	No	Yes	Total	p
	(N=352)	(N=638)	(N=990)
Race/ethnicity				<0.01
- Asian	32 ( 9.1%)	87 (13.6%)	119 (12.0%)
- Black	12 ( 3.4%)	27 ( 4.2%)	39 ( 3.9%)
- Hispanic	42 (11.9%)	129 (20.2%)	171 (17.3%)
- Other	66 (18.8%)	62 ( 9.7%)	128 (12.9%)
- White	200 (56.8%)	333 (52.2%)	533 (53.8%)
Marital status				<0.01
- Divorced	50 (14.2%)	68 (10.7%)	118 (11.9%)
- Married	165 (46.9%)	346 (54.2%)	511 (51.6%)
- Other	5 ( 1.4%)	2 ( 0.3%)	7 ( 0.7%)
- Single	105 (29.8%)	126 (19.7%)	231 (23.3%)
- Widowed	27 ( 7.7%)	96 (15.0%)	123 (12.4%)
Body mass index (BMI)	26.0 [22.0;29.0]	26.0 [22.0;30.0]	26.0 [22.0;30.0]	0.669
MMRP				0.581
- Proficient	231 (83.4%)	388 (81.5%)	619 (82.2%)
- Deficient	46 (16.6%)	88 (18.5%)	134 (17.8%)
Sex (Gender)				<0.01
- Female	156 (44.3%)	369 (57.8%)	525 (53.0%)
- Male	196 (55.7%)	269 (42.2%)	465 (47.0%)
Patient's age	65.5 [56.0;76.0]	69.0 [59.0;79.0]	68.0 [58.0;78.0]	<0.01
Tumor size (cm)	4.0 [ 2.2; 5.5]	4.1 [ 2.5; 5.8]	4.0 [ 2.3; 5.6]	0.233
Histologic grade				0.328
- Grade 1	94 (26.7%)	179 (28.1%)	273 (27.6%)
- Grade 2	229 (65.1%)	390 (61.1%)	619 (62.5%)
- Grade 3	29 ( 8.2%)	69 (10.8%)	98 ( 9.9%)
T stage (TNM-T)				0.337
- 1	59 (16.8%)	88 (13.8%)	147 (14.8%)
- 2	55 (15.6%)	85 (13.3%)	140 (14.1%)
- 3	161 (45.7%)	324 (50.8%)	485 (49.0%)
- 4	77 (21.9%)	141 (22.1%)	218 (22.0%)
Lymph node number	18.0 [14.0;25.0]	18.0 [14.0;24.0]	18.0 [14.0;25.0]	0.788
N stage (TNM-N)				0.183
- No data	12 ( 3.4%)	13 ( 2.0%)	25 ( 2.5%)
- No nodal metastasis	199 (56.5%)	326 (51.1%)	525 (53.0%)
- 1a	41 (11.6%)	94 (14.7%)	135 (13.6%)
- 1b	44 (12.5%)	76 (11.9%)	120 (12.1%)
- 1c	4 ( 1.1%)	18 ( 2.8%)	22 ( 2.2%)
- 2a	29 ( 8.2%)	56 ( 8.8%)	85 ( 8.6%)
- 2b	23 ( 6.5%)	55 ( 8.6%)	78 ( 7.9%)
BRAF mutation	15 (45.5%)	22 (34.9%)	37 (38.5%)	0.432
MLH methylation	16 (80.0%)	30 (93.8%)	46 (88.5%)	0.287
Lynch syndrome	7 (15.2%)	20 (22.7%)	27 (20.1%)	0.422
Supplementary Table 3: Patient Age and Colorectal Carcinoma
Age group	Group 1	Group 2	Group 3	Group 4	Group 5	Group 6	Total	p
	<40	40-49	50-59	60-69	70-79	80 & over	(N=1018)
	(N=25)(2.5%)	(N=77)(7.6%)	(N=186)(18.3%)	(N=256)(25.1%)	(N=253)(24.9%)	(N=221)(21.7%)
Race/ethnicity								0.005
- Asian	4 (16.0%)	10 (13.0%)	28 (15.1%)	31 (12.1%)	24 ( 9.5%)	24 (10.9%)	121 (11.9%)
- Black	3 (12.0%)	6 ( 7.8%)	6 ( 3.2%)	10 ( 3.9%)	9 ( 3.6%)	6 ( 2.7%)	40 ( 3.9%)
- Hispanic	5 (20.0%)	18 (23.4%)	41 (22.0%)	49 (19.1%)	43 (17.0%)	23 (10.4%)	179 (17.6%)
- Other	4 (16.0%)	10 (13.0%)	31 (16.7%)	32 (12.5%)	34 (13.4%)	22 (10.0%)	133 (13.1%)
- White	9 (36.0%)	33 (42.9%)	80 (43.0%)	134 (52.3%)	143 (56.5%)	146 (66.1%)	545 (53.5%)
Marital status								<0.01
- Divorced	0 ( 0.0%)	12 (15.6%)	19 (10.2%)	43 (16.8%)	31 (12.3%)	16 ( 7.2%)	121 (11.9%)
- Married	14 (56.0%)	32 (41.6%)	121 (65.1%)	131 (51.2%)	134 (53.0%)	92 (41.6%)	524 (51.5%)
- Other	1 ( 4.0%)	0 ( 0.0%)	0 ( 0.0%)	0 ( 0.0%)	5 ( 2.0%)	3 ( 1.4%)	9 ( 0.9%)
- Single	10 (40.0%)	30 (39.0%)	45 (24.2%)	71 (27.7%)	52 (20.6%)	28 (12.7%)	236 (23.2%)
- Widowed	0 ( 0.0%)	3 ( 3.9%)	1 ( 0.5%)	11 ( 4.3%)	31 (12.3%)	82 (37.1%)	128 (12.6%)
BMI	25.0 [20.0;29.0]	28.0 [23.0;32.0]	27.5 [23.0;31.0]	26.0 [22.0;30.0]	26.0 [22.0;29.0]	24.0 [21.0;28.0]	26.0 [22.0;30.0]	<0.01
MMRP status								<0.01
- Proficient	21 (91.3%)	59 (89.4%)	134 (90.5%)	173 (84.8%)	143 (79.0%)	106 (69.3%)	636 (82.1%)
- Deficient	2 ( 8.7%)	7 (10.6%)	14 ( 9.5%)	31 (15.2%)	38 (21.0%)	47 (30.7%)	139 (17.9%)
Faith (religious belief)	14 (58.3%)	41 (53.9%)	118 (64.8%)	149 (60.1%)	161 (65.2%)	155 (72.8%)	638 (64.4%)	0.027
Gender								0.007
- Female	19 (76.0%)	44 (57.1%)	99 (53.2%)	112 (43.8%)	137 (54.2%)	125 (56.6%)	536 (52.7%)
- Male	6 (24.0%)	33 (42.9%)	87 (46.8%)	144 (56.2%)	116 (45.8%)	96 (43.4%)	482 (47.3%)
Patient age (year)	38.0 [35.0;39.0]	45.0 [43.0;48.0]	54.0 [52.0;57.0]	64.0 [62.0;67.0]	74.0 [72.0;77.0]	86.0 [83.0;90.0]	68.0 [58.0;78.0]	<0.01
Anatomic site								<0.01
- Appendix	1 ( 4.0%)	3 ( 3.9%)	2 ( 1.1%)	6 ( 2.3%)	3 ( 1.2%)	0 ( 0.0%)	15 ( 1.5%)
- Ascending	1 ( 4.0%)	4 ( 5.2%)	15 ( 8.1%)	31 (12.1%)	45 (17.8%)	58 (26.2%)	154 (15.1%)
- Cecum	3 (12.0%)	5 ( 6.5%)	18 ( 9.7%)	40 (15.6%)	56 (22.1%)	59 (26.7%)	181 (17.8%)
- Descending	1 ( 4.0%)	7 ( 9.1%)	8 ( 4.3%)	10 ( 3.9%)	8 ( 3.2%)	11 ( 5.0%)	45 ( 4.4%)
- Hepatic flexure	0 ( 0.0%)	1 ( 1.3%)	2 ( 1.1%)	7 ( 2.7%)	9 ( 3.6%)	5 ( 2.3%)	24 ( 2.4%)
- Rectosigmoid	4 (16.0%)	13 (16.9%)	24 (12.9%)	30 (11.7%)	21 ( 8.3%)	9 ( 4.1%)	101 ( 9.9%)
- Rectum	4 (16.0%)	14 (18.2%)	50 (26.9%)	50 (19.5%)	40 (15.8%)	19 ( 8.6%)	177 (17.4%)
- Sigmoid	8 (32.0%)	22 (28.6%)	51 (27.4%)	59 (23.0%)	43 (17.0%)	36 (16.3%)	219 (21.5%)
- Splenic flexure	0 ( 0.0%)	5 ( 6.5%)	7 ( 3.8%)	6 ( 2.3%)	5 ( 2.0%)	6 ( 2.7%)	29 ( 2.8%)
- Transverse	3 (12.0%)	3 ( 3.9%)	9 ( 4.8%)	17 ( 6.6%)	23 ( 9.1%)	18 ( 8.1%)	73 ( 7.2%)
Tumor size (cm)	4.0 [ 1.3; 5.3]	4.1 [ 2.4; 5.2]	3.2 [ 1.8; 4.8]	3.7 [ 2.0; 5.5]	3.9 [ 2.2; 5.7]	4.7 [ 3.5; 6.4]	4.0 [ 2.3; 5.6]	<0.01
Histologic grade								0.283
- Grade 1	7 (28.0%)	18 (23.4%)	50 (26.9%)	88 (34.4%)	66 (26.1%)	58 (26.2%)	287 (28.2%)
- Grade 2	15 (60.0%)	53 (68.8%)	123 (66.1%)	144 (56.2%)	161 (63.6%)	134 (60.6%)	630 (61.9%)
- Grade 3	3 (12.0%)	6 ( 7.8%)	13 ( 7.0%)	24 ( 9.4%)	26 (10.3%)	29 (13.1%)	101 ( 9.9%)
Tumor stage (TNM-T)								<0.01
- 1	6 (24.0%)	13 (16.9%)	36 (19.4%)	50 (19.5%)	41 (16.2%)	10 ( 4.5%)	156 (15.3%)
- 2	2 ( 8.0%)	12 (15.6%)	38 (20.4%)	28 (10.9%)	30 (11.9%)	33 (14.9%)	143 (14.0%)
- 3	10 (40.0%)	37 (48.1%)	75 (40.3%)	113 (44.1%)	121 (47.8%)	140 (63.3%)	496 (48.7%)
- 4	7 (28.0%)	15 (19.5%)	37 (19.9%)	65 (25.4%)	61 (24.1%)	38 (17.2%)	223 (21.9%)
Lymph node examined	27.0 [18.0;39.0]	20.0 [15.0;26.5]	19.0 [15.0;26.0]	18.0 [14.0;25.0]	18.0 [13.0;23.0]	18.0 [14.0;24.0]	18.0 [14.0;25.0]	<0.01
Nodal stage (TNM-N)								0.006
- No data	0 ( 0.0%)	3 ( 3.9%)	10 ( 5.4%)	3 ( 1.2%)	3 ( 1.2%)	7 ( 3.2%)	26 ( 2.6%)
- No nodal metastasis	12 (48.0%)	32 (41.6%)	90 (48.4%)	138 (53.9%)	142 (56.1%)	129 (58.4%)	543 (53.3%)
- 1a	3 (12.0%)	9 (11.7%)	30 (16.1%)	42 (16.4%)	28 (11.1%)	24 (10.9%)	136 (13.4%)
- 1b	2 ( 8.0%)	15 (19.5%)	28 (15.1%)	21 ( 8.2%)	26 (10.3%)	31 (14.0%)	123 (12.1%)
- 1c	0 ( 0.0%)	1 ( 1.3%)	3 ( 1.6%)	8 ( 3.1%)	9 ( 3.6%)	1 ( 0.5%)	22 ( 2.2%)
- 2a	6 (24.0%)	10 (13.0%)	11 ( 5.9%)	23 ( 9.0%)	18 ( 7.1%)	17 ( 7.7%)	85 ( 8.3%)
- 2b	2 ( 8.0%)	7 ( 9.1%)	14 ( 7.5%)	21 ( 8.2%)	27 (10.7%)	12 ( 5.4%)	83 ( 8.2%)
